# Supplementary material
Source: PubMed Central journal article supplement (PMC1317618)

## Supplemental Figures

### **Fig. S1. Identification of major organelles in fractions from Iodixanol gradients.**

Iodixanol gradient separation of intracellular vesicles was performed using post-nuclear supernatants (PNS) harvested from unstimulated MCF-7 cells. A total of 14 fractions were collected from Iodixanol gradients and evaluated for the activity of Galactosyl Transferase (Golgi membrane), Glucose-6-Phosphatase (Endoplasmic reticulum), and Acid Phosphatase (lysosomes). The distribution of enzymatic activity is plotted as the percent in each fraction as compared to the total activity in all fractions.

### **Fig. S2. Antimycin A does not inhibit $\bullet\text{O}_2$ production in the peak vesicular fractions.**

The indicated pooled peak vesicular fractions (#2-4) from control or IL-1 $\beta$  stimulated MCF-7 cells were evaluated for NADPH-dependent  $\bullet\text{O}_2$  production in the absence or presence of antimycin A, a mitochondrial respiratory chain complex III inhibitor.

**Fig. S3. Nox isoforms expressed in MCF-7 cells.** RNA samples isolated from the colon, spleen, and kidney were used as positive controls for the detection of Nox transcripts in MCF-7 cells by RT-PCR. Arrows indicate the correct length of specific PCR products (Nox1 694 bp, Nox2 352 bp, Nox4 943 bp, and Nox5 338 bp). RT(-) indicates PCR experiments performed in the absence of reverse transcriptase. PCR detection for Nox3 was also negative but is not shown since a positive control tissue was not available.

Li et al., 2005 Figure S1

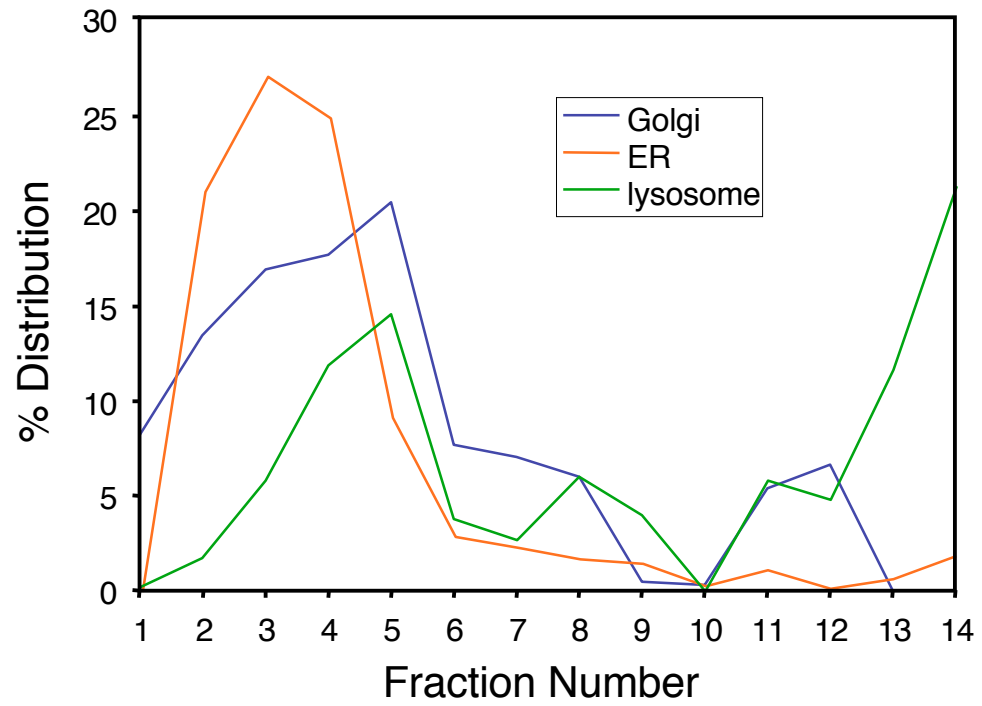

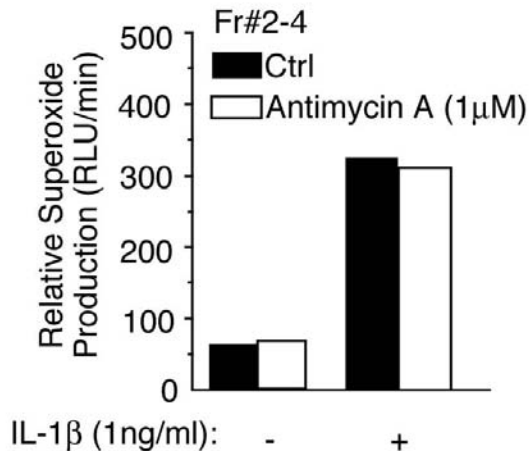

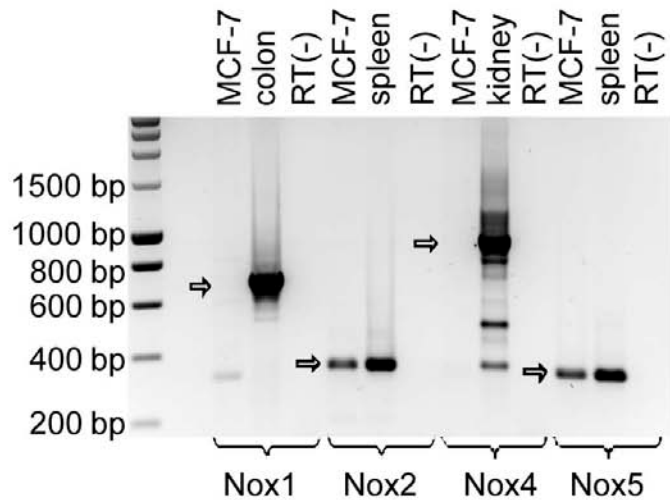

Supplement: molcellb_26_1_140__1.pdf [file molcellb_26_1_140__1.pdf]
